# Supplementary material for: Copolymers based on trialkylsilylethynyl-phenyl substituted benzodithiophene building blocks for efficient organic solar cells
Source: Royal Society of Chemistry journal article supplement (doi:10.1039/d1nj03555j), 2021-01-01
Supplement: d1nj03555j1.pdf [file d1nj03555j1.pdf]

# Copolymers based on trialkylsilylethynyl-phenyl substituted benzodithiophene building block for efficient organic solar cells

Haifen Liu,<sup>\*a</sup> Zixuan Zhu,<sup>a</sup> Huafeng Li,<sup>b</sup> Weili Fan,<sup>c</sup> Kaihua Ning,<sup>c</sup> Chao Su,<sup>c</sup> Jingpeng Ren<sup>a</sup>  
and Lixin Wang<sup>\*c</sup>

<sup>a</sup>School of Quality and Technical Supervision, Hebei University, Baoding 071002, China  
<sup>\*</sup>E-mail: liuhaifen89@163.com(H. Liu)

<sup>b</sup>Lucky Film Co., Ltd., Baoding 071054, China

<sup>c</sup>College of Physics Science and Technology, Hebei University, Baoding 071002, China  
<sup>\*</sup>E-mail: wanglx2015@hbu.edu.cn (L. Wang)

## Instruments

The NMR spectra were collected on a Bruker AVANCEIII 600 MHz spectrometer with tetramethylsilane (TMS) ( $\delta$  0 ppm) as an internal standard. The mass spectra (FT-MS) were conducted on a Thermo Fisher Scientific LTQ FT Ultra mass spectrometer. UV-vis absorption spectra were recorded using a Hitachi U-3000 spectrometer. XRD diffraction data was measured on Bruker D8 Advance. TGA curves were acquired through Netzsch STA449 F3 instrument. The electrochemical measurements were performed in a deoxygenated solution of tetra-n-butylammonium hexafluorophosphate (0.1 M) in CH<sub>3</sub>CN with a CHI604E electrochemical workstation, wherein a Pt plate working electrode coated with samples, a Pt wire counter electrode, and a Ag/AgNO<sub>3</sub> reference electrode were applied. TEM images were obtained by a FEI Tecnai G<sup>2</sup> F 20 S-TWIN with an accelerating voltage of 200 kV.

## Hole mobility measurement

Hole-only diodes were fabricated using the structure: ITO/PEDOT:PSS/blend/MoO<sub>3</sub>/Ag. Mobilities were extracted by fitting the current density-voltage curves under dark using the

space-charge-limited current (SCLC) method. The  $J$ - $V$  curves of the devices were plotted as  $J^{0.5}$  versus  $V$  using the equation:  $J = (9/8)\epsilon_r\epsilon_0\mu(V^2/L^3)$ , where  $\epsilon_0$  is the permittivity of free space ( $8.85 \times 10^{-12}$  F/m),  $\epsilon_r$  is the dielectric constant of the polymer (assumed to be 3),  $\mu$  is the hole mobility,  $V$  is the voltage drop across the device, and  $L$  is the average active layer thickness.  $V = V_{\text{appl}} - V_{\text{bi}}$ , where  $V_{\text{appl}}$  is the applied voltage to the device, and  $V_{\text{bi}}$  is the built-in voltage due to the difference in work function of the two electrodes ( $V_{\text{bi}} = 0.4$  V).

**Table S1** Influence of annealing temperature on the photovoltaic performance of PSCs based on PW30<sub>H</sub>:IDIC with a D/A ratio of 1:1.5.

| Polymer           | Annealing temperature [°C] | $V_{\text{oc}}$ [V] | $J_{\text{sc}}$ [mA cm <sup>-2</sup> ] | FF [%] | $\text{PCE}_{\text{max}}$ ( $\text{PCE}_{\text{ave}}$ ) <sup>c</sup> [%] |
|-------------------|----------------------------|---------------------|----------------------------------------|--------|--------------------------------------------------------------------------|
| PW30 <sub>H</sub> | 90                         | 0.904               | 12.27                                  | 53.0   | 5.87 (5.80 ± 0.07)                                                       |
|                   | 110                        | 0.910               | 12.70                                  | 54.0   | 6.24 (6.00 ± 0.24)                                                       |
|                   | 130                        | 0.874               | 12.30                                  | 52.9   | 5.69 (5.60 ± 0.09)                                                       |

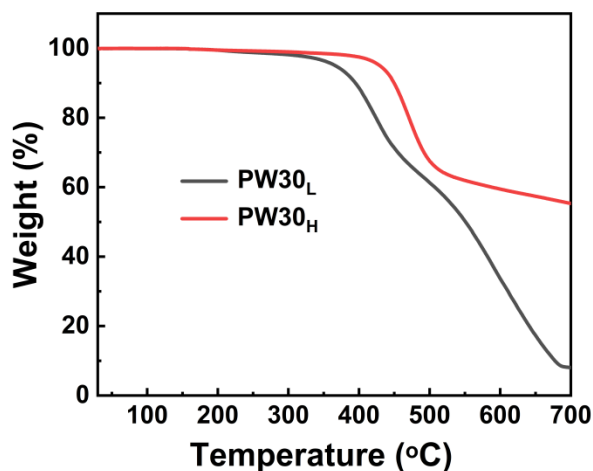

**Fig. S1** Thermogravimetric analysis curves of the polymers PW30<sub>H</sub> and PW30<sub>L</sub>.

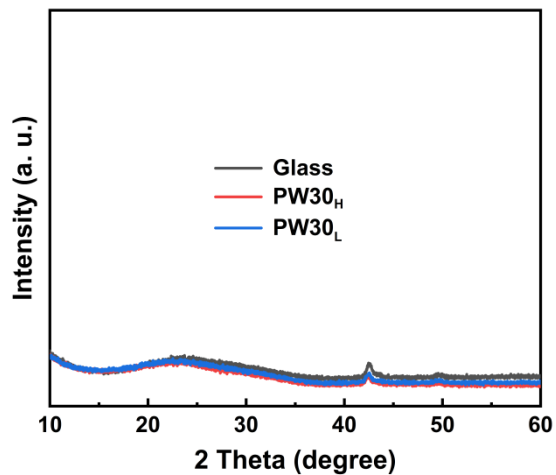

**Fig. S2** XRD diffraction patterns of the films of PW30<sub>H</sub> and PW30<sub>L</sub> coated on glass.
